# Supplementary material for: Management of interstitial lung disease associated with connective tissue disease
Source: HighWire-hosted journal article supplement (doi:10.1136/bmj.h6819), 2016-02-24
Supplement: bmj.h6819.pdf [file bmj.h6819.pdf]

### 结缔组织病相关的间质性肺疾病的管理

#### Management of interstitial lung disease associated with connective tissue disease

来源: BMJ 2016;352:h6819 doi: 10.1136/bmj.h6819

#### 摘要

肺是系统性结缔组织病(CTD)并发症的常见部位,肺部表现可以多种形式存在。间质性肺疾病(ILD)和肺高压(PH)是CTD中最常见的肺部表现。虽然普遍认为ILD发生在CTD之后,但它往往是CTD的最初表现(“肺主导”型CTD)。ILD可以存在于大多数类型的CTD中,包括类风湿关节炎、硬皮病、系统性红斑狼疮、多发性肌炎或皮炎、干燥综合征和混合性结缔组织病。尽管CTD相关的ILD(CTD-ILD)与其他形式的ILD有着相似的临床和病理表现,但CTD-ILD的预后和治疗却与其他的ILD(如特发性肺纤维化)有着极大的差异。PH可作为肺动脉高压的主要血管病变或与ILD相关(PH-ILD)。因此,需要详细的病史、体格检查、特定的血清学检测,偶尔还需肺活检,来诊断CTD-ILD。然而,PH的诊断需借助于非侵入性和(或)侵入性方法来评估肺血流动力学。尽管尚缺乏随机对照试验支持的ILD特异性治疗证据,但免疫抑制是ILD治疗的支柱。此外,治疗策略根据临床情况的不同而变化。例如,新诊断的CTD-ILD患者与急性加重的患者的治疗方案不同。免疫抑制剂仅在CTD-PH的特定病例中有所推荐,更常见的是使用选择性肺血管扩张剂。对于这两种疾病,应该评估和治疗诸如睡眠呼吸障碍、呼吸困难和咳嗽等并发症。疾病晚期的患者应考虑肺移植,但由于CTD和其他合并症,肺移植也并非总是可行的。故需要开展免疫抑制治疗等新型治疗方法的临床试验,来提供最佳的治疗策略。

#### 前言

间质性肺疾病(ILD)是结缔组织病(CTD)最常见和重要的临床表现之一。虽然ILD发生在已知CTD的患者中,但它也可能是既往还未得到识别的CTD的首要的和唯一的表现。因此,ILD的患者需要对CTD进行认真的评估,特别是因为CTD相关的ILD(CTD-ILD)的治疗与其他特发性间质性肺炎如特发性肺纤维化(IPF)的治疗方法显著不同。CTD-ILD疾病谱非常广泛,因此对自身免疫抗体及其他具有自身免疫性疾病特征的认真评估至关重要。并且,ILD可作为治疗CTD导致的并发症存在。此外,在CTD中还可能会发生其他形式的肺部受累,因此,应在已知或疑似CTD的患者评估中考虑其他形式的肺部受累(表1)。在本综述中,我们将介绍CTD-ILD的诊断方法和潜在的局限性。我们将回顾目前的疾病治疗状况以及支持治疗情况,并将其纳入到这些患者的整体治疗方案中来。

CTD-ILD主要有两种表现形式。一是在已知的CTD基础上发展为ILD,二是作为CTD首要或唯一的表现。这些表现形式将分别阐述。

Stephen C Mathai,  
Sonye K Danoff

Department of  
Medicine, Division of  
Pulmonary and  
Critical Care  
Medicine, Johns  
Hopkins University  
School of Medicine,  
Baltimore, MD, USA

Correspondence to:  
S C Mathai  
smathai4@jhmi.edu

罗萨译  
代华平校  
中日友好医院  
呼吸与危重症  
医学科

表1 结缔组织病肺部受累的特点

| 肺部受累         | 结缔组织病的类型                      |                               |                           |               |                       |               |
|--------------|-------------------------------|-------------------------------|---------------------------|---------------|-----------------------|---------------|
|              | SSc                           | RA                            | SS                        | MCTD          | PM/DM                 | SLE           |
| <b>ILD</b>   |                               |                               |                           |               |                       |               |
| 发生几率         | 很可能                           | 常见                            | 可能                        | 常见            | 很可能                   | 不常见           |
| ILD类型        | NSIP(80%~90%)<br>UIP(10%~20%) | UIP(50%~60%)<br>NSIP, OP, DIP | NSIP(28%~60%)<br>LIP(20%) | NSIP          | NSIP, OP,<br>UIP, DAD |               |
| <b>PH</b>    |                               |                               |                           |               |                       |               |
| 发生几率         | 很可能                           | 不常见                           | 不常见                       | 很可能           | 不常见                   | 不常见           |
| 类型           | PAH;PH-ILD                    |                               |                           | PAH<br>PH-ILD |                       |               |
| <b>气道疾病</b>  |                               |                               |                           |               |                       |               |
| 发生几率         | 不常见                           | 常见                            | 常见                        | 可能            | 不常见                   | 可能            |
| 类型           |                               | FB, BO, BE                    | FB, BO, BE                | BO            |                       | BO            |
| <b>其他PVD</b> |                               |                               |                           |               |                       |               |
| 发生几率         | 不常见                           | 不常见                           | 可能                        | 很可能           | 可能                    | 很可能           |
| 类型           |                               |                               | PE                        | PE            | PE                    | PE, CTEPH     |
| <b>胸膜</b>    |                               |                               |                           |               |                       |               |
| 发生几率         | 不常见                           | 常见                            | 可能                        | 可能            | 不常见                   | 很可能           |
| 类型           |                               | 胸膜炎                           | 胸膜炎                       | 胸腔积液          |                       | 胸腔积液;<br>胸膜增厚 |
| <b>DAH</b>   |                               |                               |                           |               |                       |               |
| 发生率          | 不常见                           | 不常见                           | 不常见                       | 不常见           | 不常见                   | 常见            |

注:缩写;BE:支气管扩张症;BO:闭塞性细支气管炎;CTEPH:慢性血栓栓塞性肺动脉高压;DAD:弥漫性肺泡损伤;DAH:弥漫性肺泡出血;DIP:脱屑性间质性肺炎;FB:滤泡性细支气管炎;ILD:间质性肺疾病;LIP:淋巴细胞性间质性肺炎;MCTD:混合性结缔组织病;NSIP:非特异性间质性肺炎;OP:机化性肺炎;PAH:肺动脉高压;PE:肺栓塞;PH:肺高压;PH-ILD:与ILD相关的肺高压;PM/DM:肌炎/皮肌炎;PVD:肺血管疾病;RA:类风湿关节炎;SLE:系统性红斑狼疮;SSc:硬皮病;SS:干燥综合征;UIP:寻常型间质性肺炎

## 来源和选择标准

我们使用关键词和主题词联合检索方式从PubMed、Medline和Cochrane数据库中检索自1966年1月至2015年1月期间包括lung或pulmonary、interstitial lung disease、pulmonary hypertension、connective tissue disease、rheumatologic disease [包括rheumatoid arthritis、scleroderma、systemic lupus erythematosus (SLE)、polymyositis/dermatomyositis、myositis、Sjgren's syndrome、mixed connective tissue disease]、treatment、therapy和management的所有文献。并对参考文献列表中的文章和相关文献进行筛选。排除非英文摘要和文献。我们基于研究设计的合理性和质量考虑证据等级,双盲随机对照试验(RCTs)被认为是最适合的设计,其次是前瞻性队列研究和回顾性病例研究。

## 已知自身免疫性疾病的ILD

ILD在已知自身免疫性疾病患者中很常见,患

病率因CTD类型和确诊方法的不同而异。

## 类风湿关节炎(RA)

RA占美国人口的0.5%~1%<sup>1-3</sup>,ILD是这些患者中最常见的肺部表现,发生于10%~20%的患者中<sup>4</sup>。ILD患病率根据确诊方法的不同而有所差别:肺功能、胸部计算机断层扫描或肺活检。

高分辨率胸部计算机断层扫描(HRCT)较肺量计诊断ILD更为敏感。有19%未选择的RA患者、60%~80%具有RA和呼吸系统症状的患者中存在HRCT异常。CT的最常见影像学表现包括网状影、蜂窝肺、磨玻璃影、牵拉性支气管扩张及实变影<sup>5-7</sup>。

肺活检标本的病理表现是最敏感的技术。在一些没有呼吸道症状的RA患者中,80%的外科肺活检中存在ILD<sup>8</sup>。在活检证实存在ILD的RA患者中,尽管也有其他报道,但寻常型间质性肺炎(UIP)最为常见<sup>9</sup>。呼吸系统疾病,特别是ILD,是RA患者死亡的重要原因。一项纵向队列研究显示RA-ILD使相关病死率增加约10%<sup>10</sup>。同样,最近一

项关于RA病死率的全国研究表明,近10%的死亡是由于ILD所致,这与早期的单中心研究结果一致<sup>11-12</sup>。

### 硬皮病

虽然硬皮病或系统性硬化症不如RA常见,但肺部受累在硬皮病中则较为常见。通常,硬皮病的临床定义根据皮肤受累的程度分型:正常(无明显病变);局限性(肘部和膝盖以下的皮肤受累,无躯干处受累,面部和颈部可能受累);弥漫性(躯干、肩、骨盆、面部的皮肤受累)。病变类型和内脏器官受累部位的关联已用于临床。

硬皮病的肺部受累具有ILD(尸检患者70%以上)和肺动脉高压(PAH)(占8%~12%)的特征;ILD在弥漫性硬皮病中更为常见,PAH在局限性硬皮病中更为常见<sup>13-14</sup>。目前,硬皮病相关肺疾病是硬皮病患者的主要死亡原因。一项研究评估了1972至2002年之间硬皮病患者的死亡原因,发现死因由硬皮病肾衰竭转变为ILD和PAH<sup>15</sup>。

PAH特异性治疗的进展使硬皮病和PAH患者的病死率大大改善,过去20余年,1年和2年的生存率分别由68%和47%增至81%和71%。然而,这些估计可能会被PAH诊断时间偏倚所混淆,因为专家共识现在建议在硬皮病患者中常规筛查PAH,因此患者可能在疾病进展中得以较早诊断<sup>16-17</sup>。在硬皮病患者中,肺高压(PH)可单发(PAH)或与ILD相关(PH-ILD)。PH-ILD较单发PAH相比,死亡风险增加5倍(危害比5.15,95%可信区间1.73~15.3)<sup>18</sup>。

#### 硬皮病-ILD疾病进展预测指标

通常,弥漫性硬皮病患者(基于皮肤受累的程度)较局限性硬皮病患者合并ILD的风险更高<sup>19-20</sup>。然而,这可能与抗体相关,而非皮肤受累的形式<sup>21</sup>。弥漫性硬皮病最常见的自身抗体是抗拓扑异构酶I抗体,超过85%抗体阳性的患者进展为ILD。此外,该抗体的滴度与ILD的疾病严重程度和活性相关<sup>22-23</sup>。

ILD进展的其他危险因素包括食管运动障碍和胃食管反流病<sup>20</sup>。虽然许多评估ILD进展风险的生物标志物研究正在进行之中,但目前尚无单一或联合的生物标志物被充分验证用于临床。识别硬皮病-ILD病死率的预测因子也是重要的研究领域。2014年对27项研究进行的系统性综述指出了

多项研究中确定的几个常见因素,但研究之间的差异程度也很大,也并未对混杂因素进行校正<sup>24</sup>。总之,荟萃分析指出以下变量,即患者特异性[年龄增长、男性、用力肺活量(FVC)降低、肺一氧化碳弥散量(DLCO)降低]、ILD特异性(影像学病变范围和蜂窝肺存在),以及硬皮病特异性(硬皮病持续时间短)。

### 系统性红斑狼疮(SLE)

尽管有33%~50%的SLE患者合并肺部病变,但与其他CTD相比,ILD在SLE中并不常见,只有1%~15%的SLE患者有ILD<sup>25</sup>。SLE患者肺部感染和肺癌的发生率增加。此外,所有肺的组成部分——胸膜腔、间质、气管和脉管系统——都可能受到疾病本身的影响<sup>26-27</sup>。

#### 发展为ILD的危险因素

长期疾病的病史(>10年)是发生ILD的危险因素<sup>28</sup>。此外,雷诺现象、抗U1核糖核蛋白(U1 RNP)抗体、指端硬化和异常指甲毛细血管环与ILD的影像学表现相关。这表明重叠综合征或硬皮病特征的混合性CTD与SLE中ILD的发生有关<sup>29</sup>。与RA相似,高龄也是SLE患者发生ILD的危险因素<sup>30</sup>。在SLE肺部疾病谱中,狼疮性肺炎是一种急性和致命的肺损伤,院内病死率约为50%<sup>31</sup>。非致命性狼疮性肺炎在一些患者中被认为是慢性ILD的前兆。弥漫性肺泡出血也提示预后较差。

#### 肺萎缩综合征

除了ILD之外,SLE中的第二个限制性肺疾病被称为“肺萎缩综合征”。这种疾病并不影响肺实质。报道的发病率虽有所不同,但可见于0.5%的患者<sup>32-33</sup>。这可能是由膈肌功能障碍引起的<sup>34</sup>。危险因素包括疾病持续时间延长、抗核糖核蛋白(RNP)抗体的存在和胸膜炎的病史<sup>33</sup>。

### 多发性肌炎(PM)和皮肌炎(DM)

特发性炎症性肌病的特发性包括PM、DM和临床上的无肌病性皮肌炎(CADM),所有类型均有不同程度的肌肉、皮肤、关节和肺的损害。以ILD为表现的肺部浸润可以从亚临床到快速进展,甚至致命<sup>26,35</sup>。肌炎中ILD的发生率在20%~78%,并且与发病率和病死率的增加相关<sup>36-39</sup>。

### 预后因素

一项单中心回顾性研究评估了在日本三级医院从1990至2012年间诊断DM-ILD、PM-ILD或CADM-ILD的114例患者连续性生存期的预后因素。PM-ILD、DM-ILD和CADM-ILD的病死率分别为16.7%、24.4%和37.2%，整个队列的总病死率为27.2%。这些结果与一些小型的研究结果相似，其报道的病死率为7.5%~44%<sup>37-39</sup>。急性或亚急性ILD和CADM(相对于PM)的诊断与死亡风险增加4倍以上相关<sup>40</sup>。这些数据与既往的研究相一致，说明急性和亚急性ILD更难以治疗，且预后不良<sup>38-42</sup>。

### 干燥综合征

因分类标准随着时间而不断改变，故很难估计干燥综合征患者肺部浸润的发生率。临床上显著的肺部浸润发生率为9%~24%<sup>43-45</sup>。相比，一项有关干燥综合征的大型研究中，75%的无症状患者可有肺功能、支气管肺泡灌洗和CT表现的异常<sup>46</sup>。与RA和SLE相似，干燥综合征的肺部表现通常在疾病晚期出现，且很少有特异性<sup>47</sup>。

干燥综合征可影响整个呼吸系统。小气道疾病，如滤泡性细支气管炎，是肺部受累患者的常见组织学病变。并发相关肺部疾病的患者与其他干燥综合征患者相比，生活质量和身体机能下降。此外，干燥综合征的肺部受累使10年病死率增加4倍。

### ILD亚型

早期研究证实原发性干燥综合征中，ILD主要表现为淋巴细胞性间质性肺炎(LIP)。然而，在最近的一项病例研究中，只有17%的原发性干燥综合征患者组织学诊断为LIP<sup>48</sup>。这一差异可能是由于LIP的诊断标准的修订，导致更多的患者被诊断为非特异性间质性肺炎(NSIP)。目前，NSIP是干燥综合征患者ILD最常见的亚型，发病率为28%~61%<sup>48-49</sup>。在缺乏干燥综合征其他诊断标准的情况下，SSA抗体的存在与影像学NSIP表现及肺功能受损相关，说明该抗体可能在肺部疾病的发病中起到一定作用<sup>50</sup>。

### 混合性结缔组织病(MCTD)

MCTD在1972年首次被定义，而这一名称仍有争议<sup>51</sup>。一般来说，U1 RNP抗体阳性被定义为MCTD。但是，三分类系统已经建立了明确的诊断

标准。其中两个以肺部受累作为诊断特征。事实上，MCTD患者的肺部受累较常见，发生率从47%~78%不等<sup>52</sup>。近期一项匈牙利研究对201例MCTD患者平均随访12.5年(标准差7.2)，发现近53%患有ILD，36%患有胸膜炎或心包炎，24%患有PH<sup>53</sup>。挪威一项基于对126名MCTD患者的研究发现，52%的患者有HRCT异常，其中19%有严重肺纤维化。严重的纤维化与年龄相关，而与诊断或吸烟的时长无关<sup>54</sup>。同一研究团队对147名患者的另一项队列研究表明，抗Ro52抗体与肺纤维化的严重程度相关。这些抗体与肺纤维化相关性的比值比(OR)为4.4(1.8~10.3;  $P < 0.002$ )<sup>55</sup>。基于匈牙利队列201名MCTD患者临床特征的聚类分析发现，合并PH的患者较ILD患者有更高的病死率<sup>53</sup>。因此，MCTD的肺部受累较为常见，并且可使病死率增加。

### 新诊断ILD患者的CTD评估

越来越多的人认识到ILD可能是潜在CTD的首要或唯一表现。在这种情况下，患者可能呈现出

表2 自身免疫相关的血清学检测项目及其意义

| 检测项目     | 意义                            |
|----------|-------------------------------|
| ANA      | 非特异，但高滴度与自身免疫性疾病的诊断有关         |
| RF       | 存在于RA中，但对于其他自身免疫性疾病也是非特异性的    |
| Scl-70   | 与硬皮病有关                        |
| RNP      | 与混合性结缔组织病相关                   |
| Jo-1     | 肌炎特异性抗体                       |
| 扩展的肌炎抗体谱 | 包括其他肌炎特异性或肌炎相关抗体              |
| 抗合成酶     | 包括PL-7、PL-12、EJ、OJ抗体——均与ILD相关 |
| MDA-5    | 与糜烂性Gottron征和侵袭性ILD相关         |
| PMScl    | 多发性肌炎硬皮病重叠综合征                 |
| Ro-52    | 与更具侵袭性ILD相关                   |
| CPK      | 肌炎中升高，但在CADM可正常               |
| 醛缩酶      | 可能在CADM中有低水平升高                |
| SSA/SSB  | 干燥综合征相关抗体                     |
| CCP      | 与RA相关                         |
| ANCA     | 在单纯ILD中不常见，但可见于ILD            |

注：ANA：抗核抗体；ANCA：抗中性粒细胞胞质抗体；CADM：无肌病性皮肌炎；CCP：抗环瓜氨酸多肽；CPK：肌酸磷酸激酶；ILD：间质性肺疾病；Jo-1：抗Jo-1抗体；MDA-5：抗MDA-5抗体；PMScl：抗PMScl抗体；RNP：抗核糖核蛋白抗体；Ro-52：抗Ro-52抗体；Scl-70：抗Scl-70抗体；SSA/B：干燥综合征相关抗体A/B；RF：类风湿因子；RA：类风湿关节炎

两种重叠的方式：一种是急性形式，或一种亚急性形式。

### 未知CTD患者急性发作ILD

急性进展性ILD通常发生在年轻患者中，健康人发生数周至数月的进行性呼吸困难提示ILD急性发作。这些患者往往由于I型呼吸衰竭和HRCT上进展性磨玻璃影而住院，并迅速转入重症监护室。

在这样的患者中，关键及首要的是早期考虑ILD诊断。如果患者病情稳定，可通过支气管肺泡灌洗液和早期的血清学检查评估感染情况。表2提供了初步检验和相关注意事项列表。因为许多推荐是基于小样本病例研究或单中心研究，因此诊断的特异性和敏感性有限。在治疗急性期患者时，常常无法及时获得这些检验结果，因此需要在CTD确诊之前即开始治疗。此外，许多其他检验方法可考虑用于支持CTD的诊断。

可以通过大腿磁共振成像(MRI)、肌电图或肌肉活检(或其组合)评估肌酶(肌酸磷酸激酶或醛缩酶)寻找患者的肌炎证据。这些方法中的每一种都可以用作诊断“无肌病”或无明显的肌肉无力性肌炎的证据。

由于在某些CTD(如硬皮病)中运动障碍的发生率高，如食管运动障碍，胸部CT表现为食管扩张，也可辅助诊断CTD。

当考虑有伴随ILD急性发作的血栓栓塞性疾病可能，以及考虑PH作为CTD的主要表现时，运用超声心动图诊断PH则是有用的<sup>56</sup>。近期一项研究发现，与正常对照组相比，硬皮病患者的静脉血栓栓塞风险增加了2倍以上，突显了需要对该类人群进行静脉血栓栓塞风险的评估<sup>57</sup>。虽然PAH最常见于硬皮病的诊断，但也可能发生在皮肌炎或多发性肌炎及其他CTD的患者中。此外，CTD患者也有发生慢性血栓栓塞性PH的风险，特别是SLE患者。

### 未知CTD患者亚急性发作ILD

对所有特发性间质性肺炎患者进行评估的关键步骤是识别ILD的已知原因。这一步是至关重要的，这是目前美国胸科学会/欧洲呼吸学会(ATS/ERS)指南诊断IPF的第

一步<sup>58</sup>。然而在临床实践中，新发ILD的诊断常依靠肺活检等有创的方法。因为仅在诊断不确定时推荐外科肺活检，所以通过对CTD完全评估之后<sup>58</sup>，很少有患者需要进行外科肺活检。虽然血清学方法对CTD的诊断至关重要，但它并不能取代仔细的询问病史、家族史、系统性回顾和体格检查。患者经常出现与肺部症状无关的其他症状，如雷诺现象、皮疹或脱发、肌肉疼痛或无力、胃食管反流、关节疼痛或肿胀。因此，鼓励患者说出新近出现的症状是非常必要的。鉴于CTD可影响多个器官系统，对于非典型表现的患者，咨询风湿病学、皮肤科和其他专家常是有益的。

#### 基于血清学检测的局限性

当对以ILD为主要表现或仅有症状的患者进行CTD评估时，有两个常见的问题。一是患者具有自身抗体，但不符合相关CTD的诊断标准。随着血清学实验如“肌炎特异性”抗体，包括抗合成酶抗体的临床应用，这一问题也越来越受到关注。图1为肌炎的诊断标准<sup>59-60</sup>。诊断肌炎时，肌肉和皮肤表现被认为是疾病的主要特征。自从发现Jo-1抗体和其他抗合成酶抗体以来，许多携带这些高度特异性抗体的患者很少甚至没有肌肉或皮肤的受累。实际上“无肌病性皮肌炎”即用来描述在无肌肉受累情况下的急性肺部表现。需指出的是，我们对CTD的理解受到现有技术的限制。因此，需要与风湿病学组讨论重新定义CTD，包括将肺作为主要受累器官。

二是尽管患者具有某些指向性临床特征，但存在非特异性抗体如ANA阳性，而更为特异的抗体则不存在。这通常发生在如雷诺现象等情况下。因此，提出了一种新的CTD种类，被称为具有自身免疫特征的ILD<sup>50</sup>。最近的ATS/ERS共识为用于研

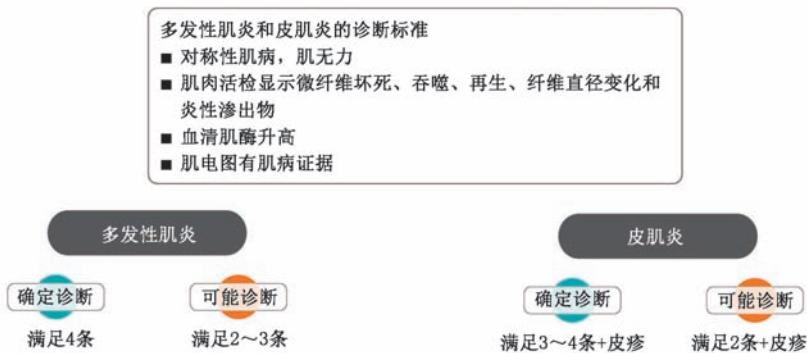

图1 肌炎的Bohan及Peter诊断标准<sup>59-60</sup>

究目的将其命名为IPAF,即具有自身免疫特征的间质性肺炎<sup>61</sup>。尽管这种新的分类可能有助于正在进行的研究,但它对于那些诊断不明的患者并无帮助。

另一个问题是目前CTD的诊断受临床检验和自身抗体的限制。最佳实例是近来MDA-5抗体的发现。该抗体最初被描述为存在于CADM患者中相对分子质量为140 000 Da的蛋白<sup>62</sup>。MDA-5以及其他临床检验的开展使先前未定义的ILD纳入IPAF。此外,随着临床检验的使用和MDA-5相关ILD抗体谱的不断扩展,MDA-5相关ILD疾病谱已经从急性ILD向更为良性的方向发展<sup>63</sup>。近期的临床试验表明,目前未定义的CTD患者携带尚有待鉴定的自身抗体。在这些自身抗体被完全阐释之前,重新评估现有CTD的诊断标准可能是有用的。

#### ILD的分类:影像学 and 病理学检查

HRCT用于评估CTD-ILD可能患者。这种技术具有极大的诊断和预后价值,尽管准确的解释是至关重要的(图2),然而许多研究小组已经总结了用于鉴别UIP的特征性表现。ATS/ERS制定的IPF诊断标准为其影像学表现提供了有用的指南<sup>58,64</sup>。患有CTD和UIP的患者似乎比其他组织病理学类型的CTD-ILD预后更差。因此,在考虑个别患者对治疗反应的可能性时,区分UIP、NSIP和机化性肺炎(OP)是非常有用的。但是并不是所有的治疗均会出现影像学改善,所以无论影像学表现如何,都

应该开始治疗。

虽然已有多种影像分期系统用于IPF,但并未在CTD-ILD患者中证实<sup>58</sup>。然而,已经提出了用于硬皮病相关ILD患者的简单分期系统<sup>65</sup>。该系统通过平均HRCT 5个独立水平的肺受累程度(网格影、磨玻璃影比例和网格影增粗),并将其与FVC相结合用于确定患者是否具有“局限性”或“弥漫性”肺实质发生。一项队列研究发现,与局限性肺部受累的患者相比,215名弥漫性肺部受累患者的死亡风险增加了3倍以上(危害比为3.46, 2.19~5.46;  $P<0.0005$ ),结果具有临床意义。该系统是否可用于预测对ILD的治疗反应性或有效性,仍需开展其他的CTD-ILD队列研究。

外科肺活检对于已知和疑诊CTD-ILD患者的作用尚不清楚。侵袭性肺活检的主要争论点在于肺活检对于活检相关病变类型预后(UIP与其他类型)的潜在作用,以及诊断其他疾病如癌症的潜力。需平衡这些潜在的获益和风险,包括手术直接并发症(持续或未纠正的气胸)、手术相关的心肺并发症(心肌梗死或血栓栓塞事件)以及与手术相关的ILD急性加重。当考虑行外科肺活检时,必须权衡潜在的获益和风险(包括对治疗的影响)。患者必须是做出这一决策的主要人。作为外科肺活检的替代方案,气管镜和支气管肺泡灌洗液可用于评估感染,灌洗液细胞计数也可能适用于一些患者。

#### ILD作为治疗自身免疫性疾病的并发症

对于ILD和已知CTD的患者,药物治疗在CTD

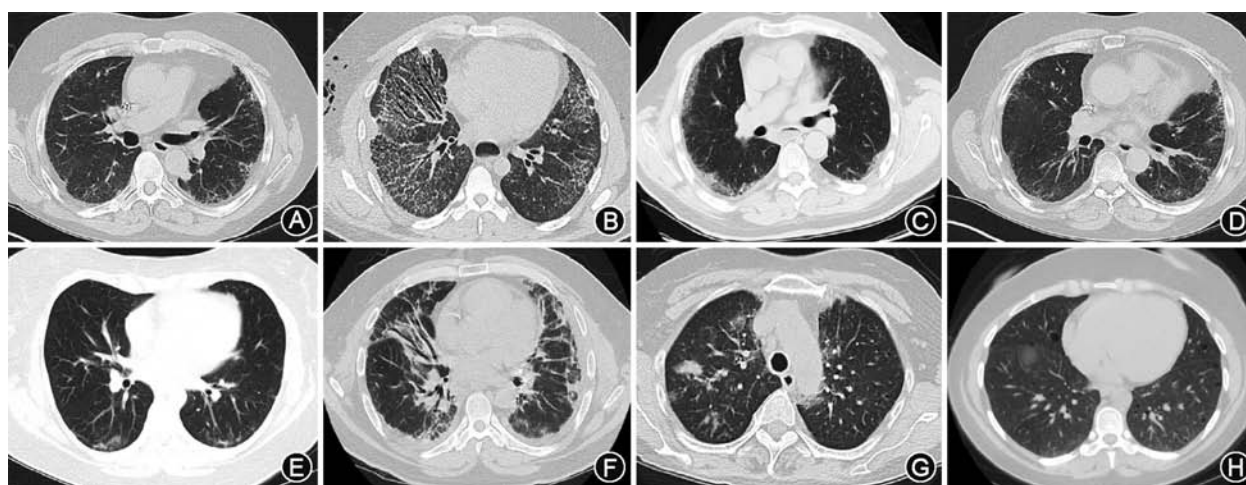

图2 结缔组织病(CTD)相关的间质性肺疾病在已知CTD以及不同的CTD之间可有不同的影像学表现。(A)硬皮病伴网格影。(B)硬皮病合并快速进展性间质性肺疾病和肺动脉高压;食管扩张。(C)硬皮病伴有肺部网格影及食管运动障碍,食管可见食物残留。(D)硬皮病伴有轻微网格改变。(E)Jo-1相关的抗合成酶综合征伴机化性肺炎的表现。(F)PL-7相关的抗合成酶综合征伴急性呼吸衰竭。(G)狼疮性肺炎。(H)干燥综合征伴囊性改变,可能继发于淋巴细胞性间质性肺炎。

中的作用仍不明确。许多抗风湿药物和经常用于治疗CTD的生物制剂已经证实与ILD相关。框图1包含了常用药物列表。用于治疗CTD的药物综合及更新列表与ILD等的肺毒性相关,这一内容可在pneumotox.com上找到。

由于缺乏循证医学证据,以下观察和建议基于临床经验。当考虑患者ILD可能由CTD或其治疗引起时,治疗开始的时间对判断可能有帮助,也可能没有帮助。在一小部分患者中,当某一药物开始使用后,一些新的症状才随之出现。对于这类患者,停药并密切随访(有或没有短期的类固醇治疗)可能就足够了。对于其他患者,可在某一药物使用后几个月,ILD的症状隐匿性出现。这在RA患者中很常见,CTD和治疗都可能与ILD相关。因此,经常需要停药一段时间来评估其对ILD的影响。在此期间,类固醇可用于CTD并治疗ILD。一旦患者病情有所改善,特异性药物治疗需重新推荐使用。但需密切随访肺部病变,包括肺功能检查,并告知患者可能会出现症状反复,在此过程中患者需要报告任何症状变化。

### 框图1 结缔组织病相关的间质性肺疾病的常用药物

甲氨蝶呤  
肿瘤坏死因子抑制剂  
金制剂  
青霉胺  
来氟米特  
磺胺类

## CTD-ILD的治疗

### 一般治疗策略

鉴于ILD在自身免疫疾病中的表现差异很大,没有一种管理策略适用于每种可能的临床情况。轻症、病情稳定的患者可能不需要治疗。然而,一般原则可适用于多种情况,包括如下所述的急、慢性疾病。虽然没有CTD-ILD的诊治指南,但是常常将推荐用于治疗IPF的方案用于CTD-ILD,包括静息低氧血症患者的氧疗及对于无症状胃食管反流病的治疗<sup>64</sup>。

### ILD急性期

通常,自身免疫性疾病患者的ILD急性发作有

两种表现:急性间质性肺炎或潜在ILD的急性加重。在这两种情况下,应排除导致呼吸失代偿的其他原因。虽然在CTD-ILD中没有针对性研究,IPF急性加重的原因包括感染、肺栓塞、冠状动脉疾病、新发心律失常、肺水肿、气胸和手术<sup>66-67</sup>,特别是肺活检。

与ILD有关的PH患者发生急性加重的风险更高,这可能受到饮食和液体限制不严格的影响<sup>68</sup>。暴露于空气污染的环境中,特别是臭氧和二氧化氮,也可能导致ILD急性加重<sup>69</sup>。CTD-ILD的患者发生其他风险的可能性增高,如弥漫性肺泡出血(SLE中更常见)、误吸(硬皮病)和药物诱导的毒性(甲氨蝶呤和生物制剂,如英夫利昔单抗、阿巴西普和利妥昔单抗)。这些药物应该被排除在外。

虽然没有急性间质性肺炎(AIP)和CTD-ILD急性加重的诊治指南,但是根据IPF的观察性研究推断出的一般治疗原则常用于临床。这些干预措施包括:

- 广谱抗生素覆盖典型和非典型病原体
- 基于其他检验或诸如存在免疫抑制等危险因素,覆盖肺孢子菌和真菌
- 在疑似药物毒性的情况下,停用可能的药物
- 大剂量甲基泼尼松龙冲击治疗(1 g 静脉注射3天)<sup>64,70</sup>。

2013年对3项RCTs的分析表明,胃食管反流病的治疗可降低发生ILD急性加重的风险,因此应考虑增加抗反流治疗<sup>71</sup>。在弥漫性肺泡出血经保守治疗和纠正凝血仍无效的情况下,血浆置换术已被成功地应用于临床<sup>72</sup>。然而,尽管有这些干预措施,AIP和CTD-ILD急性加重的病死率仍高达33%~100%<sup>73-75</sup>。对自身免疫性肌炎相关性ILD,静脉用免疫球蛋白和激素冲击治疗可能是有益的<sup>76-77</sup>。CTD-ILD急性发作也可考虑静脉注射或口服环磷酰胺。

### ILD慢性期

尽管CTD的肺部并发症会造成一定的临床影响,但是几乎没有有关这类人群的药物RCTs研究。仅有两项关于CTD-ILD的RCTs研究,两者均研究环磷酰胺治疗硬皮病相关ILD的疗效,于下文讨论<sup>78-79</sup>。因此,由于现有证据的限制,慢性CTD-ILD的治疗是基于硬皮病相关ILD和其他ILD如IPF的病例研究和外推法。鉴于各种CTD-ILD

与IPF之间的临床表现存在明显差异,这种方法并不理想。下面将讨论用于治疗CTD-ILD的各种免疫抑制剂。

## 药物

### 糖皮质激素

糖皮质激素仍然是临床治疗CTD-ILD的主要手段,但很少有指导其使用的相关资料。近来一项单中心回顾性研究纳入71例硬皮病-ILD患者,该研究发现1年内接受连续激素治疗者的FVC(平均为158 ml)有所改善,而未接受糖皮质激素治疗的患者的FVC降低(61 ml)。然而,很少有其他证据支持激素在这些患者中的使用<sup>80</sup>。此外,由于担心激素导致硬皮病性肾衰竭,泼尼松龙的剂量不应超20 mg/天<sup>81-82</sup>。对于其他类型的CTD-ILD,激素的剂量、途径、持续时间和缓慢减量方案通常由临床医生和临床情况所决定。肺活检发现OP是特发性炎性肌病(IIM)并发ILD患者的常见类型。病例研究中隐源性机化性肺炎(COP)使用大剂量糖皮质激素(泼尼松龙每天1 mg/kg)治疗,说明这种类型的ILD患者对激素治疗可能更为敏感<sup>83-84</sup>。然而,其他类型的IIM-ILD可能对激素反应较差<sup>85</sup>。同样,在其他类型的CTD-ILD的长期管理中,已经报道了其对于激素治疗的不同反应。

### 硫唑嘌呤

硫唑嘌呤是抑制T细胞和B细胞增殖的嘌呤类似物。它通常与糖皮质激素联合用于CTD-ILD的治疗。然而,很少有证据支持其应用,特别是单一用于CTD-ILD。一项RCT研究了硫唑嘌呤作为硬皮病ILD维持治疗方案的有效性,发现与安慰剂组(12个月)相比,静脉注射环磷酰胺6个月后继以硫唑嘌呤维持治疗,FVC未见显著性差异(4.19%;  $P=0.08$ )<sup>79</sup>。硬皮病ILD的观察性研究也得出了类似的结果,静脉注射环磷酰胺后继以硫唑嘌呤维持治疗12个月对肺功能无改善<sup>86-87</sup>。一项中国台湾关于IIM-ILD的队列回顾性分析表明硫唑嘌呤可提高患者的生存率。然而,目前尚没有关于硫唑嘌呤用于其他CTD-ILD的报道。

硫唑嘌呤常用作CTD-ILD联合治疗的一部分。一项研究比较了三药联合(硫唑嘌呤、泼尼松龙和N-乙酰半胱氨酸)与单用N-乙酰半胱氨酸在轻至中度IPF患者中的疗效。研究发现联合治疗

组患者的入院和死亡风险较高,使得这项研究提前终止<sup>88</sup>。然而,由于这类研究并未在CTD-ILD患者中进行,因此没有证据表明联合硫唑嘌呤和泼尼松龙治疗CTD-ILD患者及活检确诊的UIP患者是有害的。

### 环磷酰胺

环磷酰胺是一种烷化剂,对T细胞具有多重作用,可导致其免疫记忆受损,是唯一在CTD-ILD中有RCTs研究的免疫抑制剂。两项研究均在硬皮病相关的ILD患者中进行。第一项研究被称为“Scleroderma Lung Study”,比较口服环磷酰胺(每天2 mg/kg)组与安慰剂组,发现FVC有所改善(2.53%;  $P=0.03$ )。总体而言,严重不良事件无明显差异,但治疗组患者出现白细胞减少和血尿的次数较多<sup>78</sup>。第二项研究比较初始低剂量糖皮质激素和环磷酰胺(每月静脉滴注600 mg/m<sup>2</sup>体表面积×6个月)联合治疗,而后使用硫唑嘌呤(每天2.5 mg/kg)维持治疗组与安慰剂组,发现治疗组FVC( $P=0.08$ )无显著改善。尽管这些研究中FVC的变化很小,并且值得怀疑,但几项观察性研究也发现环磷酰胺可改善FVC<sup>89-92</sup>。此外,正如本领域专家指出,临床普遍对于重症患者开放性使用环磷酰胺,可能使大量非重症患者纳入2项RCTs研究中,从而产生转诊偏倚,未能产生预期效应<sup>93</sup>。然而,来自Scleroderma Lung Study的纵向数据表明其疗效随时间的推移而消退<sup>94</sup>。此外,对于给药最佳持续时间、给药方式(静脉冲击或每日口服)和给药顺序(环磷酰胺,随后是硫唑嘌呤或吗替麦考酚酯)仍不清楚。

如上所述,尚未在其他CTD-ILD中进行环磷酰胺的RCTs研究。已经报道的PM-ILD、DM-ILD和MCTD-ILD的病例对照研究具有相似的FVC改善及不良反应。

### 甲氨蝶呤

甲氨蝶呤抑制叶酸和嘌呤代谢以及T细胞活化。常用于治疗CTD关节病变,如RA和预防血管炎复发<sup>95</sup>。但其在CTD-ILD管理中的作用仍不太清楚,且因甲氨蝶呤的肺毒性而限制了它在CTD-ILD中的应用<sup>96</sup>。然而,在甲氨蝶呤用于CTD患者的前瞻性研究中,甲氨蝶呤肺毒性(根据卡森标准定义)的患病率在6个月时仅为2/223例,1年为2/188例。这相当于每192人死亡1例,低于之前的回顾性研究<sup>97-98</sup>。本研究中大多数患者有RA,这些患者



肺毒性的风险可能更高;然而,大多数受试者在入组时并没有潜在ILD的证据,可能会限制这项研究结果对其他CTD或潜在ILD患者的普遍适用性。在临床诊疗中,甲氨蝶呤偶尔用于硫唑嘌呤或吗替麦考酚酯治疗失败或不耐受的硬皮病-ILD患者。该药也可用于PM/DM-ILD,或许能有效治疗肌炎<sup>99-100</sup>。很少有研究报道甲氨蝶呤在其他类型CTD-ILD患者中的应用。

#### 吗替麦考酚酯

吗替麦考酚酯通过抑制肌苷一磷酸脱氢酶(嘌呤合成中的关键因子)减弱T细胞和B细胞增殖。该药已在各种CTD-ILD人群中进行了研究,且结果大多是可喜的。2013年一项病例研究纳入125例不同类型CTD-ILD患者,包括硬皮病( $n=44$ )、多发性肌炎或皮炎( $n=32$ )和RA( $n=19$ ),指出吗替麦考酚酯可使FVC持续改善,并减少糖皮质激素的使用量<sup>101</sup>。相似的发现可见于一项小型硬皮病-ILD病例研究<sup>102</sup>。此外,一项回顾性分析纳入了12例硬皮病-ILD患者和环磷酰胺临床治疗无反应患者。这些患者随后应用吗替麦考酚酯后,FVC改善25%,CT显示病变无进展者在50%以上<sup>103</sup>。但是,2013年的一项病例对照研究纳入20例接受环磷酰胺或吗替麦考酚酯治疗的硬皮病-ILD患者,通过为期2年的随访发现,虽然肺功能指标未见显著差异,但吗替麦考酚酯治疗组可能导致病变的影像学表现进展<sup>104</sup>。

重要的是,近期完成的Scleroderma Lung Study II研究为进一步了解吗替麦考酚酯在硬皮病-ILD中的作用提供了依据(NCT00883129)。本研究将患者随机分为两组,即吗替麦考酚酯2年组和口服环磷酰胺1年+随后序贯安慰剂1年组<sup>105</sup>。主要终点指标是FVC预计值的改善,次要终点指标包括肺功能[总的肺容积(TLC)、DLCO]、CT表现(纤维化评分)、症状、与健康相关的生活质量和皮肤病变。当前本研究结果仅可见摘要。

吗替麦考酚酯在其他类型CTD-ILD中的作用尚不清楚。PM/DM-ILD回顾性病例研究指出,9名接受吗替麦考酚酯治疗的患者表现为1年内肺功能稳定及激素需求量减少。上述回顾性队列研究也同样发现吗替麦考酚酯可使DM/PM-ILD和RA-ILD患者的FVC改善。尽管该药有较好的耐受性,但近期病例研究发现吗替麦考酚酯可能导致肾移植患者出现低丙种球蛋白血症,可能使患者感染

复发,从而使这些患者有发生支气管扩张症的风险<sup>106</sup>。然而,这种作用可能并不是吗替麦考酚酯所特有的。一项队列研究纳入45例无ILD的SLE患者,接受吗替麦考酚酯或环磷酰胺治疗,结果发现两组低丙种球蛋白血症的发生率相似<sup>107</sup>。尽管吗替麦考酚酯治疗组的IgA水平显著降低,但并没有随后发生ILD的证据。

#### 钙调素抑制剂

通常通过抑制T细胞活化和信号转导用于防止实体器官发生移植排斥反应,近来病例研究和病例报告报道了钙调素抑制剂他克莫司和环孢素用于DM/PM-ILD和HM-ILD患者中。最近一项日本的回顾性研究纳入49名PM/DM-ILD患者,比较接受传统治疗(泼尼松龙与静脉注射环磷酰胺或环孢素)组与传统治疗联合他克莫司组,结果发现他克莫司治疗组的无事件生存率显著改善<sup>108</sup>。然而,相应的评论指出,该研究结果可能并不适用于其他人群,因抗MDA-5阳性疾病——一种侵袭性CTD-ILD的类型,在日本是高发病率的(日本一项研究指出占HM-ILD的40%)<sup>109-110</sup>。此外,由于他克莫司组中有许多患者接受过环磷酰胺,因此并不能明确这种有益的结果是与环磷酰胺,还是与他克莫司相关。

在另一项使用环孢素或他克莫司治疗HM-ILD患者的回顾性队列研究中发现,大多数患者肺功能表现为改善或稳定(13/15)<sup>111</sup>。对于其他类型的CTD-ILD,并没有头对头比较钙调素抑制剂的研究及其应用的报道。除此之外,尽管目前的临床经验建议环孢素的剂量为每天2~5 mg/kg,他克莫司为每天1~3 mg,并监测谷值避免药物毒性,但对于该适应证,他克莫司或环孢素的给药剂量并未经过标准化。

#### 生物制剂

利妥昔单抗是针对B细胞表面抗原CD20的单克隆抗体,导致B细胞从外周循环中快速且持续耗尽6~9个月。利妥昔单抗最初用于某些类型的白血病和淋巴瘤的治疗,其作用机制和对免疫性疾病发病机制的潜在作用使得其适应证扩大到诸如CTD-ILD的应用。一项小规模研究随访2年,发现接受4个周期利妥昔单抗治疗的硬皮病-ILD患者,其FVC与基线相比有显著改善<sup>112</sup>。尽管利妥昔单抗在一项针对肌炎结局的大规模HM RCT中得出了阴性结果,但是一系列病例研究表明利妥昔单抗在多种类型的CTD-ILD中都具有作用,包括PM/

DM-ILD、RA-ILD 和 MCTD-ILD<sup>113-115</sup>。一项利妥昔单抗与环磷酰胺对进展期 CTD-ILD (包括硬皮病-ILD、IIM-ILD 和 MCTD-ILD) 的随机临床试验研究目前正在进行中,主要终点指标为 FVC 的改善,预计将于 2017 年完成 (RECITAL study, NCT01862926)。

伊马替尼是一种特异性酪氨酸激酶抑制剂 (BCR-Abl),也参与蛋白质磷酸化。伊马替尼曾经用于化疗,但之后已用于治疗 CTD-ILD,特别是硬皮病-ILD。然而,与利妥昔单抗不同,伊马替尼研究结果喜忧参半,且其耐受性问题可能会限制它在 CTD-ILD 中的应用。一项研究报告指出,使用伊马替尼治疗 24 例硬皮病-ILD 患者 1 年,FVC 平均升高超过 6%。然而,另一项纳入 20 例硬皮病-ILD 患者的研究发现伊马替尼耐受性差,只有 60% 的患者完成了研究<sup>116-117</sup>。第二项研究中伊马替尼的剂量较高(600 比 400 mg,每天),可能导致药物不耐受和一些不良反应,包括胃肠道反应、皮疹和肾功能不全。因此,伊马替尼在治疗 CTD-ILD 中的作用尚不清楚,需进一步研究。

其他生物制剂,如托珠单抗、厄库珠单抗和阿仑单抗可能在未来治疗 CTD-ILD 有作用,但目前这些药物的使用经验有限。值得注意的是,肿瘤坏死因子靶向生物制剂——英夫利昔单抗和依那西普——可能会增加罹患 ILD 的风险,特别是 RA 患者<sup>118-119</sup>。这些药物应在 RA-ILD 和其他类型的 CTD-ILD 中慎用。

## CTD-ILD 并发症的治疗

### PH

PH 是以肺血管损伤和重塑为特征的慢性疾病,导致肺血管阻力增加、右心衰竭,最终导致死亡。它与许多疾病有关,包括 CTD,以及主要影响肺血管系统以外的器官系统,例如心脏、肺实质、肝脏和肾脏。直接肺血管受累可发生于肺栓塞和内皮损伤后的肺血管重塑,无明显静脉血栓栓塞,称为 PAH。

PH 定义为由右心导管测量的平均肺动脉压 $\geq 25$  mmHg。目前根据相关疾病和危险因素分为 5 类<sup>120</sup>。因为 CTD 可影响多器官系统,所以 PH-CTD 可与 PH 的 5 类中的任何一类相关。最常见的 PH-CTD 是 I 类 (PAH)、II 类 (与心脏疾病相关)、III

类 (与肺部疾病相关);硬皮病患者可能比其他类型的 CTD 更易出现这 3 类 PH。

CTD 常合并 PH 和 ILD,特别是硬皮病。由于缺乏常规应用右心导管的队列研究,尽管 PH 在硬皮病-ILD 中的真实发病率尚不清楚,但它对生存率有很大影响。一项硬皮病-ILD 的队列研究运用多变量分析,结果显示合并 PH 的患者 (通过超声心动图测量右心室收缩压 $>45$  mm Hg) 较未合并 PH 者的死亡风险高出 5 倍<sup>121</sup>。总体而言,硬皮病-ILD-PH 患者的中位生存期为 2~3 年<sup>18,122</sup>。然而,尽管整体而言,与 CTD 相关的 PAH 患者的结局有所改善,但 CTD-ILD-PH 的靶向治疗效果较差。虽然尚无针对 CTD-ILD-PH 的特异性肺血管扩张剂的 RCTs 研究,但是硬皮病-ILD-PH 的观察性研究已经发现,超适应症使用 PH 的新药并不会出现症状、肺功能或生存率的持续性改善。一项 70 例硬皮病-ILD-PH 患者的队列研究中,与基线相比,PAH 特异性药物治疗并不能影响症状、6 分钟步行距离或血流动力学,中位生存期少于 2 年<sup>123</sup>。然而,近期一项纳入了 99 例硬皮病-ILD-PH 患者的单中心队列研究显示,持续输注曲前列环素 (前列环素类似物) 可改善其终点结局,2 年生存率接近 60%,表明 PAH 特异性治疗可能改善硬皮病-ILD-PH 的结局<sup>124</sup>。对于治疗出现的不同反应,可能与不同队列患者特征的差异相关,例如肺实质受累的程度。

重要的是,用“弥漫”和“局限”两个词描述硬皮病-ILD 的分类对于硬皮病-ILD 具有一定的预后价值,但尚有待证实这种分类是否可作为对 PAH 特异性治疗反应的预测因子。这种分类体系可能有利于识别那些潜在的、可能从 PH 的治疗中获益的患者。因此,进一步对 CTD-ILD-PH,特别是硬皮病-ILD-PH 中 PAH 特异性靶向治疗的研究是必要的。

### 睡眠障碍

睡眠呼吸紊乱也可合并 CTD-ILD。由咳嗽导致微觉醒,夜间低氧血症和呼吸做功增加,从而引起失眠和睡眠中断是常见的,糖皮质激素等药物可能会对睡眠结构、效率和质量产生负面影响<sup>125</sup>。睡眠障碍,如不宁腿综合征,在诸如硬皮病和 RA 等 CTD 中很常见,约占 30%<sup>126</sup>。

虽然在 CTD-ILD 中缺乏一些严谨的研究,但阻

塞性睡眠呼吸暂停在其他类型的ILD中的发病率较高,并且不与白天嗜睡或肥胖等症状直接相关<sup>127</sup>。近来一项研究纳入不同类型的ILD患者发现,55%的硬皮病-ILD患者经多导睡眠监测证实有阻塞性睡眠呼吸暂停。有趣的是,这些患者白天症状并不严重(通过Epworth嗜睡量表评估),并且对于那些是否合并阻塞性睡眠呼吸暂停的患者未见明显差异,说明该量表可能尚不足以识别那些高危患者。对这些阻塞性睡眠呼吸暂停患者,给予持续气道正压通气可改善睡眠质量和生活质量<sup>128</sup>。呼吸肌无力或严重限制性肺部疾病(通常FVC<45%预计值)相关的夜间低通气可能导致缺氧和高碳酸血症,出现白天的症状<sup>129</sup>。因此,对于CTD-ILD患者行睡眠功能检查是合理的,即使是没有典型的阻塞性睡眠呼吸暂停危险因素的患者。

### 呼吸困难和咳嗽

CTD-ILD患者由于肺实质的进行性纤维化,常有因呼吸功能损伤所致的呼吸困难和慢性咳嗽。然而,呼吸困难也可能由胸腔积液、PH或骨骼肌无力(伴有呼吸肌受累)引起,可能最常见于HM-ILD;针对性的治疗可改善这些症状。肺康复是重要的辅助治疗方法,因为它可以改善呼吸困难、抑郁、焦虑和生活质量<sup>130</sup>。尚无CTD-ILD呼吸困难的有效治疗方法。但是,低剂量鸦片和抗焦虑药物可大体缓解纤维性肺疾病的症状<sup>131-132</sup>。

咳嗽是ILD常见的症状,且很难能够有效的治疗。鉴于胃食管反流可能与ILD有关,及其在某些CTD-ILD(如硬皮病)中的高患病率,故应积极治疗胃食管反流病,包括饮食、改变生活方式以及药物等。尤其是已经有研究发现胃食管反流的严重程度与硬皮病-ILD和MCTD-ILD有关<sup>133</sup>。然而,一项研究纳入14例IPF患者,给予高剂量抑酸治疗后,记录基线资料并随访24小时食道测压,研究发现虽然治疗8周后酸反流事件减少,但无酸反流事件增加,且咳嗽症状未见改善<sup>134</sup>。尽管如此,胃食管反流病与CTD-ILD之间的关系可能与IPF不同。我们的经验是为难治性咳嗽患者提供治疗和改变生活方式。

干燥综合征患者可能会有与咳嗽相关的咽干,雾化等渗盐水或许能够改善气道干燥<sup>135</sup>。应找寻并处理引起咳嗽的其他原因,如鼻后滴漏或药物不良反应(如血管紧张素转换酶抑制剂)。尽管没有

CTD-ILD相关的研究报告,但一项IPF的RCT研究发现沙利度胺可减少咳嗽<sup>136</sup>。然而,沙利度胺可能增加某些患者的肺栓塞风险及水肿的发生,因此应慎用<sup>137</sup>。

### 临终关怀

最近有研究表明,临终关怀可改善罹患终末期疾病如肺癌患者的生活质量,甚至生存获益,从而促进我们进一步研究将临终关怀用于ILD的患者<sup>138</sup>。一项RCT纳入105例慢性呼吸困难和多种肺部疾病患者[包括19例(18%)ILD患者],将患者随机分为呼吸支持训练组及临终关怀+常规护理组。结果发现临终关怀可显著提高全部受试者及ILD患者的6个月生存率<sup>139</sup>。然而,因ILD患者样本量小和研究时间较短的原因,限制了这一结论的得出。尽管如此,临终关怀肯定能在某些无法治愈的慢性疾病(如ILD)中发挥重要作用,ATS/ERS指南也推荐将这类患者转诊给临终关怀专家。进一步需确定临终关怀在CTD-ILD中的作用。

### 造血干细胞移植

造血干细胞移植作为“Autologous Stem Cell Transplantation International Scleroderma Trial”研究的一部分已于硬皮病患者中进行了研究<sup>140</sup>。这一开放、平行研究纳入156例早期弥漫性硬皮病患者,比较了自体造血干细胞移植与静脉注射环磷酰胺12个月的疗效。值得注意的是,这些患者中大多数患有ILD(>85%)。尽管移植组的长期无事件生存、改良Rodnan皮肤评分(表示皮肤病变严重程度)、FVC和患者重要结局指标均有改善,但是移植组中,有些事件,包括第一年的死亡事件(8比0),增加。此外,移植组中有22%的患者在12~24个月出现疾病复发,需要免疫抑制剂治疗。这表明移植并不能治愈大部分患者,并且尽管移植可能改善远期生存,但可能会对短期生存造成不利影响。造血干细胞移植在硬皮病中的进一步研究正在进行中,可能有助于阐明该造血干细胞移植在硬皮病-ILD中的作用[Stem Cell Transplant vs Cyclophosphamide (SCOT);NCT00114530]。

### 肺移植

由于考虑到当前病情可能会影响肺移植的预后,所以许多中心将CTD-ILD视为肺移植的相对禁忌证。造成不良结局的潜在原因包括胃食管反

流(认为引起闭塞性细支气管炎综合征)、肾脏疾病(常用免疫抑制剂和抗生素管理移植后并发症)和肺外疾病,如肌炎(免疫抑制和肺康复管理移植后并发症)。出于这些顾虑,1995至2010年期间,在全球所有肺移植患者中,CTD相关性肺疾病的患者所占比例不足2%<sup>141</sup>。然而,最近的研究表明,CTD-ILD患者的移植后结局与非CTD-ILD的移植后结局没有显著差异<sup>142-146</sup>。因此,对于CTD-ILD应参考此研究中心关于肺移植的评估和管理的经验。

## 指南

虽然没有CTD-ILD的管理指南,但是我们参考了由美国胸科协会/欧洲呼吸学会/日本呼吸学会/拉丁美洲胸科协会联合制定的IPF管理指南<sup>147</sup>。同时我们也回顾了指南推荐的PAH治疗方案<sup>148-149</sup>。

### CTD-ILD新型治疗方法

近来批准用于IPF的治疗方案在CTD-ILD中的作用尚不清楚。一例病例报道了吡非尼酮用于硬皮病-ILD患者使肺功能有所改善,但仍需要进一步研究来证实这一观察结果<sup>150</sup>。最近完成的一项开放、随机、平行研究,即评价吡非尼酮用于硬皮病-ILD(LOTUSS试验; NCT01933334)的安全性和耐受性的研究。该研究表明吡非尼酮用于硬皮病患者与其用于IPF患者具有相似的不良反应。拟对尼达尼布开展类似的研究。尼达尼布是一种细胞内酪氨酸激酶抑制剂,可延缓IPF患者肺功能下降的速度。

目前用于IPF的新型促炎和促纤维化介质抑制剂正在研发中,例如溶血磷脂酸受体抑制剂,它是在上皮损伤过程中由血小板释放的介质。Th2炎症通路也备受关注;近期有关IPF的转化研究说明了抗IL-13单克隆抗体抑制白细胞介素13(IL-13)对IPF的作用<sup>151</sup>。这些和其他通路被认为是IPF发病机制的一部分,也可能将在CTD-ILD中进行研究。关于CTD-ILD的研究已于近期完成或仍在进行中。例如,在硬皮病-ILD(NCT01559129)

中研究了沙利度胺的衍生物和血管生成抑制剂的派莫利度胺(CC-4047),但是由于未能达到主要终点指标(FVC改善)而在中期分析中终止。联合试验,如使用硼替佐米——用于治疗多发性骨髓瘤的蛋白酶体抑制剂——与吗替麦考酚酯联合治疗硬皮病-ILD(NCT01559129)。靶向抑制血栓形成过程的药物——达比加群——用于硬皮病-ILD患者的试验(NCT02426229)也即将开展。这些新型抗炎、抗纤维化和抗血管生成药物的研究可能在不久的将来为CTD-ILD的治疗提供循证依据。

## 结论

肺部疾病是CTD的常见并发症或临床特点。尽管对CTD-ILD的认识不断提升,但确诊CTD-ILD仍存在争议,并且需要综合临床、生理、影像学、血流动力学、实验室和病理学证据。免疫抑制仍然是ILD治疗的主要手段,尽管很少有RCT证据支持的特异性药物用于多数CTD-ILD。支持治疗,包括治疗合并症,如PH和睡眠呼吸紊乱,以及肺康复治疗,可能会改善这些患者的症状。同样,PAH和PH-ILD常常继发于CTD,表现为高发病率和病死率。故需要开展用于CTD-ILD的新型抗纤维化和免疫调节剂以及用于PH-CTD的血管活性剂和抗增殖剂的RCTs研究,从而提高我们对这些进展性疾病的认识和管理。

贡献者(Contributors): Both authors helped in the design, drafting, and critical revision of the review and the analysis and interpretation of the data; they both approved the final version to be published. SCM is guarantor.

利益竞争(Competing interests): We have read and declare the following interests: SCM: paid consultancies for Actelion, Bayer, and Gilead; research funding from NIH/NHLBI and the Scleroderma Foundation; unpaid officerships of the Pulmonary Hypertension Association and the American College of Chest Physicians. SKD: paid consultancies for Boehringer-Ingelheim; research funding from the Huayi Zhang Discovery Fund and the Cecilia Fisher Rudman Fund; unpaid officerships of the American College of Chest Physicians and American Thoracic Society.

来源与同行评议(Provenance and peer review): Commissioned; externally peer reviewed.

参考文献见bmj.com和bmj.yiigle.com。

BMJ takes no responsibility for the accuracy of the translation from the published English language original and is not liable for any errors that may occur.

# BMJ
